# Supplementary material
Source: ML conference proceedings conference paper supplement (https://openaccess.thecvf.com/content/CVPR2023/html/Agro_Implicit_Occupancy_Flow_CVPR_2023_paper.html)
Supplement: Supplementary file 1 [file Agro_Implicit_Occupancy_Flow_CVPR_2023_supplemental.zip]

Archive with 4 entries (4 files):
- 2155_implicitO.mp4
- __MACOSX/._2155_implicitO.mp4
- 2155_ImplicitO_supplementary.pdf
- __MACOSX/._2155_ImplicitO_supplementary.pdf
